# Supplementary material for: Major adverse cardiovascular events in older emergency department patients presenting with non-cardiac medical complaints
Source: Neth Heart J. 2022 Jun 7;30(12):559–66. doi: 10.1007/s12471-022-01700-z (PMC9691805; doi:10.1007/s12471-022-01700-z)
Supplement: Supplementary file 3 — Supplemental file with three tables – Supplemental Table S1 with ECG abnormalities according to the Simplified ECG score – Supplemental Table S2 with baseline characteristics of the included and non-included patients – Supplemental Table S3 with results of follow up echocardiogram in patients with MACE [file 12471_2022_1700_MOESM3_ESM.docx]

**Supplemental File**

**Major adverse cardiovascular events in older emergency patients with**

**non-cardiac complaints**

N Zelis, MD; AMM Roumans-van Ooijen, MD; J Buijs, MD PhD; DJW van Kraaij, MD PhD; SMJ van Kuijk, PhD; PW de Leeuw, MD PhD; PM Stassen, MD PhD

**Table of contents**

Supplemental Table S1…..………………………………………………………………………………………………p2

Supplemental Table S2…………………………………………………………………………………………………..p3

Supplemental Table S3…………………………………………………………………………………………………..p4

| **Supplemental Table S1** *ECG abnormalities* | |
| --- | --- |
| **ECG abnormality according to the Simplified ECG Score[1]** | ***n*=331** |
| Left axis deviation | 73 |
| ST-depression | 70 |
| Atrial fibrillation | 59 |
| Intraventricular conduction delay | 49 |
| Left ventricle hypertrophy | 43 |
| Prolonged QTc interval | 36 |
| Presence of Q-wave | 26 |
| Right bundle branch block | 23 |
| Left bundle branch block | 22 |
| Right axis deviation | 11 |
| Left atrial abnormality | 8 |
| Right ventricle hypertrophy | 7 |

*ECG* electrocardiogram, *QTc* corrected QT interval

| **Supplemental Table S2** *Baseline characteristics of the included and non-included patientsa* | | |
| --- | --- | --- |
| **Characteristic** | **Included**  **(*n*= 450)** | **Non-includedb**  **(*n*=200)** |
| Median age (IQR), years | 79 (73-85) | 78 (72–85) |
| Male sex, n (%) | 234 (52.0) | 100 (50.0) |
| Living in nursing- or care home, n (%) | 39 (8.7) | 23 (11.7) |
| Median CCI score (IQR) | 2 (1-3) | 2 (1-3) |
| Manchester triage category, n (%) |  |  |
| Orange | 56 (12.5) | 38 (19.2) |
| Yellow | 254 (56.8) | 108 (54.5) |
| Green | 133 (29.8) | 51 (25.8) |
| Treatment, n (%) |  |  |
| Internal medicine | 326 (72.4) | 153 (76.5) |
| Admission | 366 (81.3) | 171 (85.5) |
| 30-day mortality, n (%) | 51 (11.3) | 30 (15.0) |

Values are *n* (%) unless stated otherwise.

aIn total, 450 patients were included in the derivation cohort during the prospective study period in Zuyderland MC (included patients). The non-included patients represent a sample of 200 patients who were not included during the prospective study period for reasons other than refusal.

bThere were no significant differences in baseline characteristics between patient who were included and patients who were not included.

*CCI* Charlson comorbidy Index score; *IQR* interquartile range

| **Table S3.** *Results of follow up echocardiogram in patients with MACE* | |
| --- | --- |
| **Echocardiographic finding** | ***n*=41** |
| **New findings on echocardiogram** |  |
| Further or new decrease in left ventricle function | 5 |
| Further or new decrease in left ventricle function in combination with heart valve disease | 2 |
| Increase in pulmonary hypertension | 2 |
| Acute septum rupture | 1 |
| Pericardial effusion | 1 |
| **Stable heart function on echocardiogram** |  |
| Stable valve disease | 1 |
| Stable impaired left ventricle function in combination with heart valve disease | 2 |
| **No earlier echocardiogram** |  |
| Impaired left ventricle function | 5 |
| Heart valve disease | 7 |
| Impaired left ventricle function in combination with heart valve disease | 1 |
| Pulmonary hypertension | 1 |
| **Normal echocardiogram** | 13 |
|  |  |
| **Median Time to echocardiogram, days (IQR)** | **76 (17 - 288)** |

**References**

1. Tan SY, Sungar GW, Myers J, et al. A simplified clinical electrocardiogram score for the prediction of cardiovascular mortality. Clin Cardiol. 2009;32(2):82-6. doi: 10.1002/clc.20288.
